# Supplementary material for: How friction and adhesion affect the mechanics of deep penetration in soft solids
Source: Royal Society of Chemistry journal article supplement (doi:10.1039/d2sm00638c), 2022-01-01
Supplement: d2sm00638c1.pdf [file d2sm00638c1.pdf]

## Supplementary Information

The data extracted from the literature [11,25] appear in Figure S1.

| $G_c/\mu R$ |      | R          |          |          |
|-------------|------|------------|----------|----------|
|             |      | 0.0033     | 0.0150   | 0.0500   |
| Gels Type   | 0.12 | 1,382.5758 | 304.1667 | 91.2500  |
|             | 0.16 | 1,618.1818 | 356.0000 | 106.8000 |
|             | 0.20 | 1,181.8182 | 260.0000 | 78.0000  |
|             | 0.30 | 2,725.0927 | 599.5204 | 179.8561 |

| $G_c/\mu R$ |           | R       |        |        |
|-------------|-----------|---------|--------|--------|
|             |           | 0.5000  | 1.0000 | 2.0000 |
| Gels Type   | Sili 8800 | 2.2963  | 1.1481 | 0.5741 |
|             | B452      | 19.0000 | 9.5000 | 4.7500 |

| $a/R$     |      | R      |        |        |
|-----------|------|--------|--------|--------|
|           |      | 0.0033 | 0.0150 | 0.0500 |
| Gels Type | 0.12 | 0.6535 | 0.6780 | 0.7181 |
|           | 0.16 | 0.6519 | 0.6745 | 0.7113 |
|           | 0.20 | 0.6552 | 0.6819 | 0.7255 |
|           | 0.30 | 0.6476 | 0.6646 | 0.6924 |

| $a/R$     |           | R      |        |        |
|-----------|-----------|--------|--------|--------|
|           |           | 0.5000 | 1.0000 | 2.0000 |
| Gels Type | Sili 8800 | 0.6660 | 0.8991 | 1.2565 |
|           | B452      | 0.3474 | 0.4108 | 0.5080 |

| $P'/\mu R$ |      | R      |        |        |
|------------|------|--------|--------|--------|
|            |      | 0.0033 | 0.0150 | 0.0500 |
| Gels Type  | 0.12 |        | 20.83  | 19.53  |
|            | 0.16 |        | 60.61  | 24.24  |
|            | 0.20 | 55.10  | 40.40  |        |
|            | 0.30 | 106.87 | 46.63  | 12.79  |

| $P'/\mu R$ |           | R      |        |        |
|------------|-----------|--------|--------|--------|
|            |           | 0.5000 | 1.0000 | 2.0000 |
| Gels Type  | Sili 8800 | 0.70   | 0.46   | 0.60   |
|            | B452      |        | 1.34   | 0.76   |

Figure S1: On the left [25] and right [11] we report the data extrapolated and the corresponding dimensionless quantities  $G_c/\mu R$ ,  $a/R$ , and  $P'/\mu R$ , for different materials and needle radii
